# Supplementary material
Source: Springer Nature journal article supplement (https://www.springermedizin.de/resource/supplementary/13045_2014_400_MOESM9_ESM.pdf/9661292)

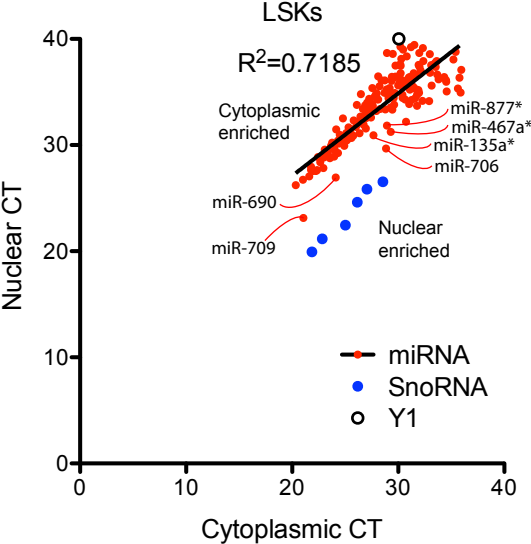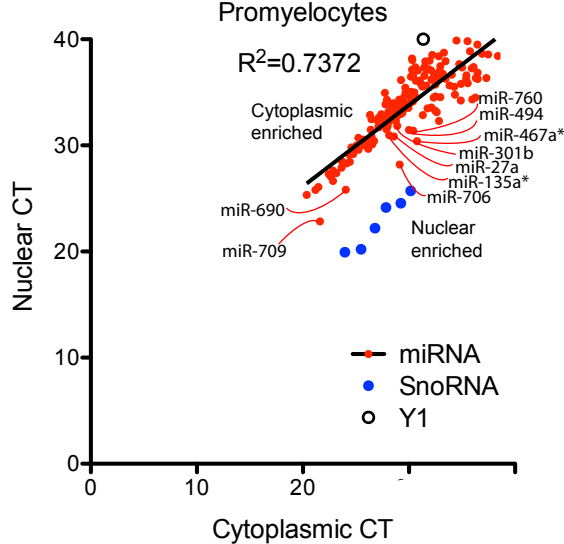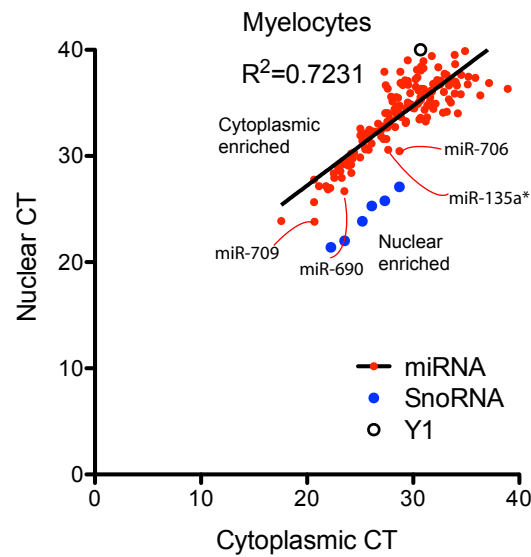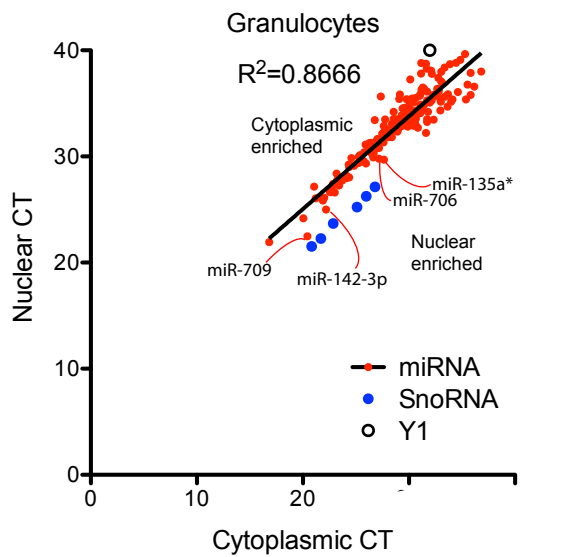

Supplement: MOESM9 [file 9661292]
